# Supplementary material
Source: Springer Nature journal article supplement (https://www.springermedizin.de/resource/supplementary/12906_2013_1797_MOESM8_ESM.pdf/9522828)

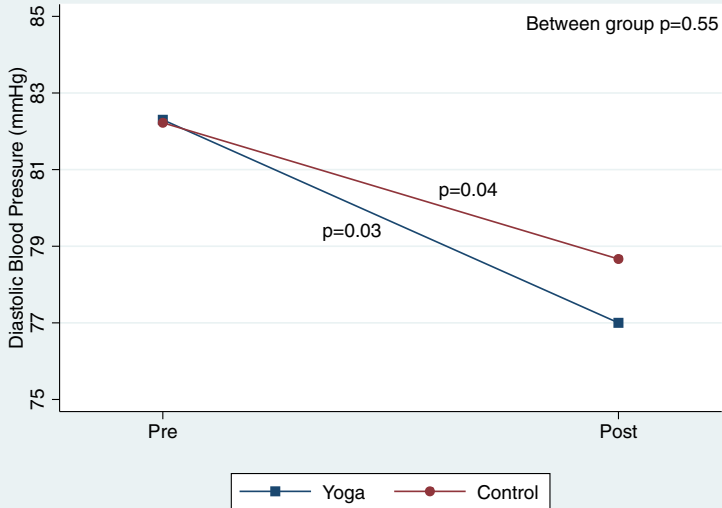

Supplement: MOESM8 [file 9522828]
